# Supplementary material for: Exploring the Activation Mechanism of the mGlu5 Transmembrane Domain
Source: PubMed Central journal article supplement (PMC7069277; doi:10.3389/fmolb.2020.00038), 2020-03-06
Supplement: Table_1.pdf [file Table_1.pdf]

## Supporting Information

# Exploring the activation mechanism of the mGlu5 transmembrane domain

Isaias Lans<sup>1,4</sup>, Óscar Díaz<sup>1,2,3</sup>, James A. R. Dalton<sup>1,2,3</sup> and Jesús Giraldo<sup>1,2,3\*</sup>

<sup>1</sup>Laboratory of Molecular Neuropharmacology and Bioinformatics, Unitat de Bioestadística and Institut de Neurociències, Universitat Autònoma de Barcelona, 08193 Bellaterra, Spain

<sup>2</sup>Unitat de Neurociència Traslacional, Parc Taulí Hospital Universitari, Institut d'Investigació i Innovació Parc Taulí (I3PT), Institut de Neurociències, Universitat Autònoma de Barcelona, Spain

<sup>3</sup>Instituto de Salud Carlos III, Centro de Investigación Biomédica en Red de Salud Mental, CIBERSAM, Spain

<sup>4</sup>Biophysics of Tropical Diseases, Max Planck Tandem Group, University of Antioquia, Medellín, Colombia

\*Corresponding author:

Jesús Giraldo

Laboratory of Molecular Neuropharmacology and Bioinformatics, Unitat de Bioestadística and Institut de Neurociències, Universitat Autònoma de Barcelona. 08193 Bellaterra, Spain

Phone: +34 93 581 38 13; Fax : +34 93 581 23 44; Email : [Jesus.Giraldo@uab.es](mailto:Jesus.Giraldo@uab.es)

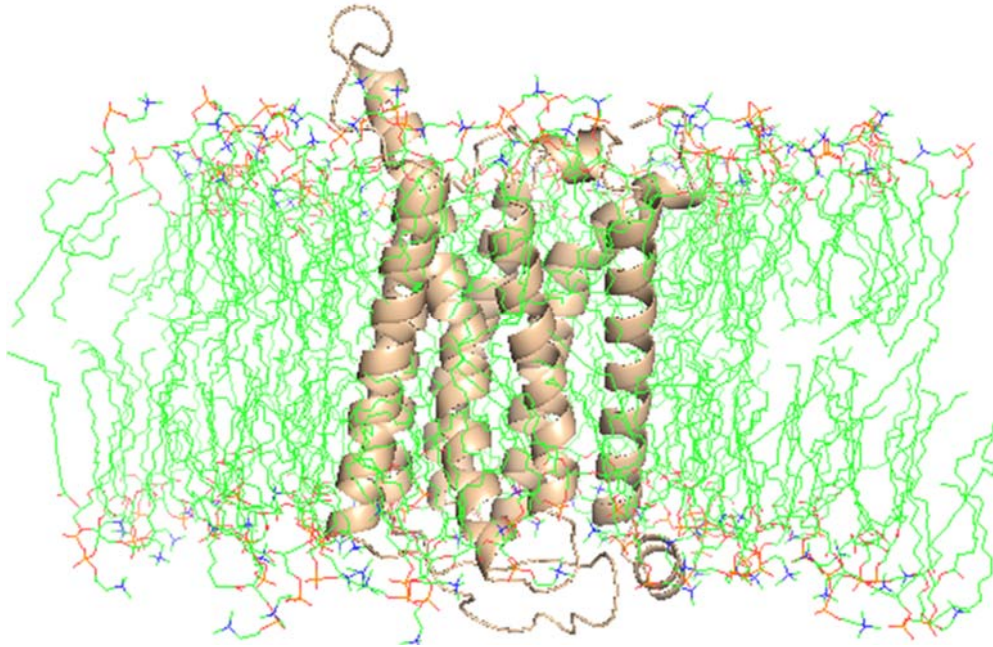

Figure S11. mGlu5 TM receptor model inserted in a POPC membrane model.

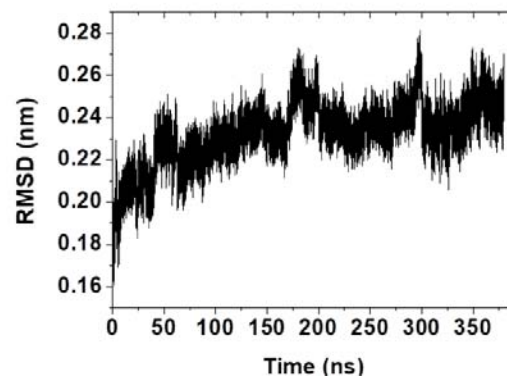

Figure S12. Backbone RMSD of the mGlu5 TM domain relative to the starting structure of the unbiased molecular dynamics simulation.

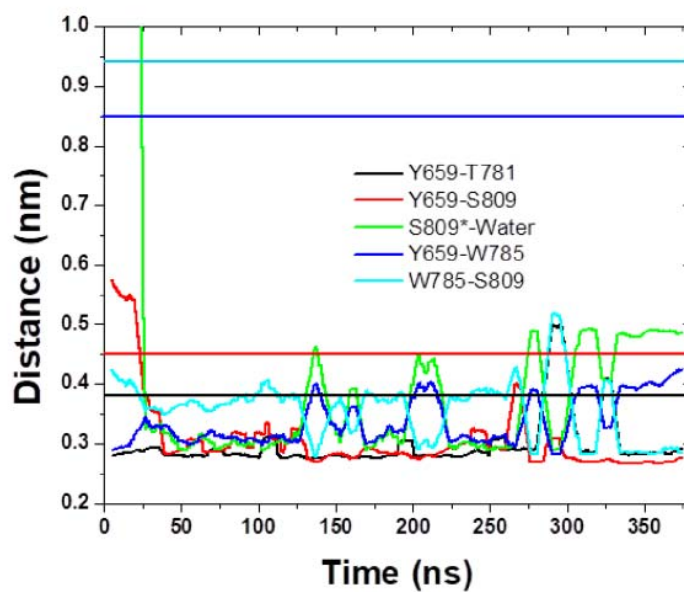

Figure S13. Time-window average (using a 10 ns window) of selected distances in the allosteric site along the unbiased molecular dynamics simulation. The horizontal lines represent the corresponding distances observed at the crystallographic PDB ID: 4OO9 structure. Black, red, green, blue and cyan lines represent the OH\_Y659-OH\_T781, OH\_Y659-OH\_S809, OH\_S809-O\_Water, OH\_Y659-N\_Side\_chainW785 and N\_Side\_chainW785-OH\_S809 distances, respectively.

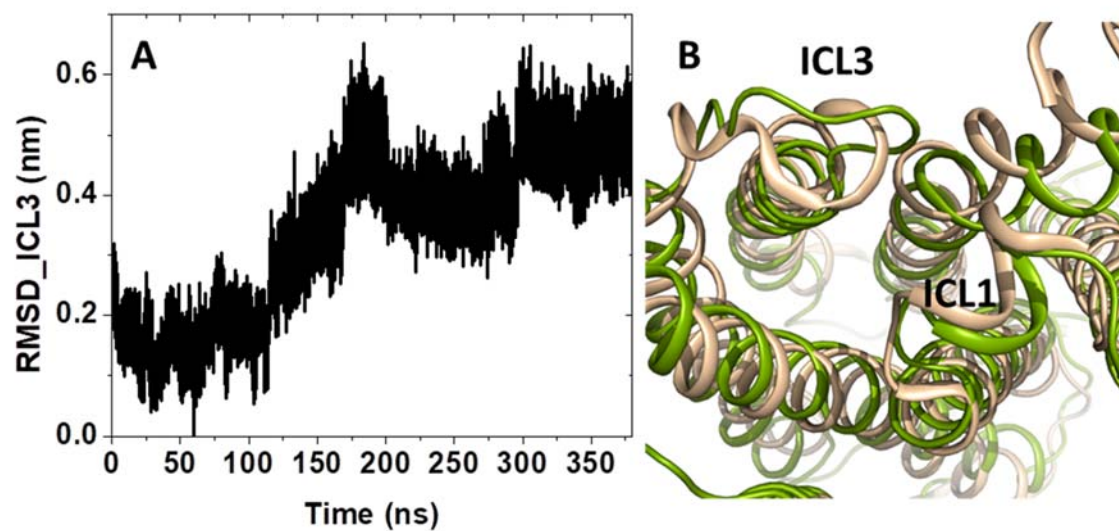

Figure S14. Backbone RMSD of the ICL3 relative to the starting structure of the unbiased molecular dynamics simulation. The snapshot at 350 ns and the starting structure are showed in green and brown, respectively.

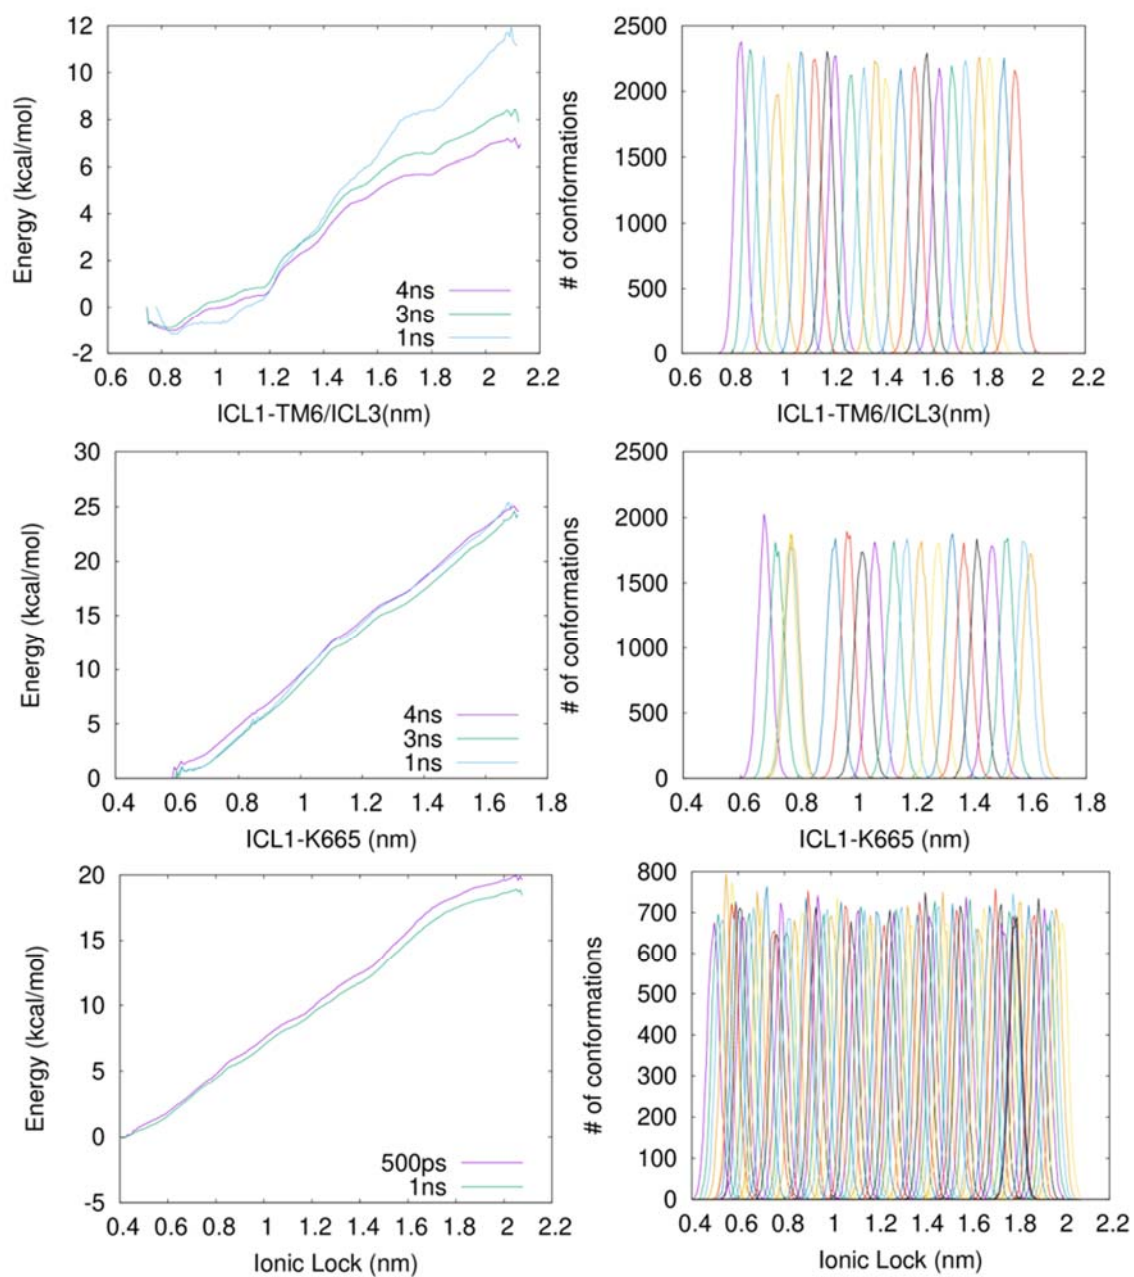

Figure S15. The PMF for each collective variable was calculated at different simulation times. The plots on the left show the convergence of the PMFs (small changes in the PMF profile are observed between the last 2 PMFs for each collective variable). The plots on the right show the histograms for each collective variable. Although the PMFs for the ionic lock collective variable were calculated at 500 ps and 1 ns, the number of windows used was 3 times greater than the number of windows used for the ICL1-TM6/ICL3 and ICL1-K665 collective variables.

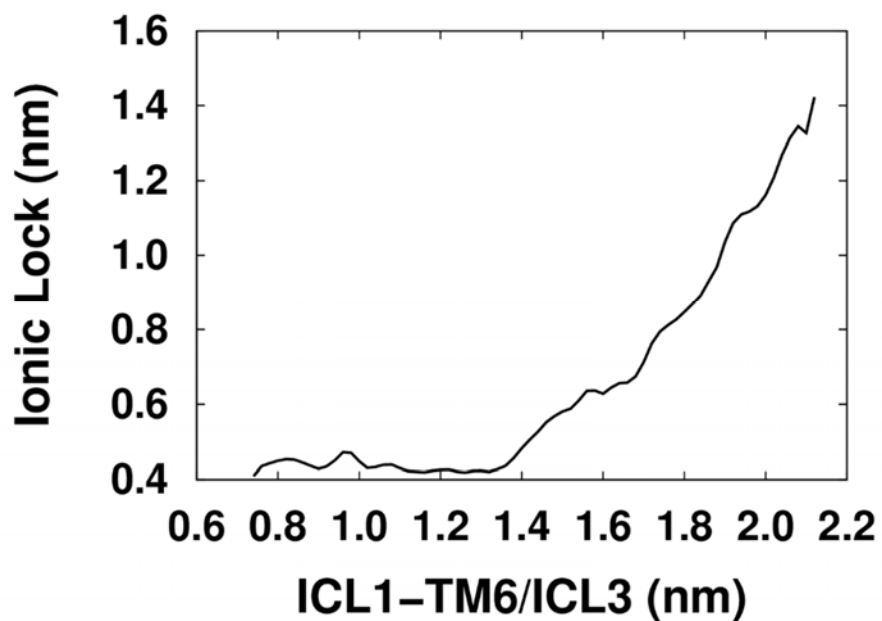

Figure S16. Average distance of the Ionic lock along the ICL1-TM6/ICL3 collective variable.

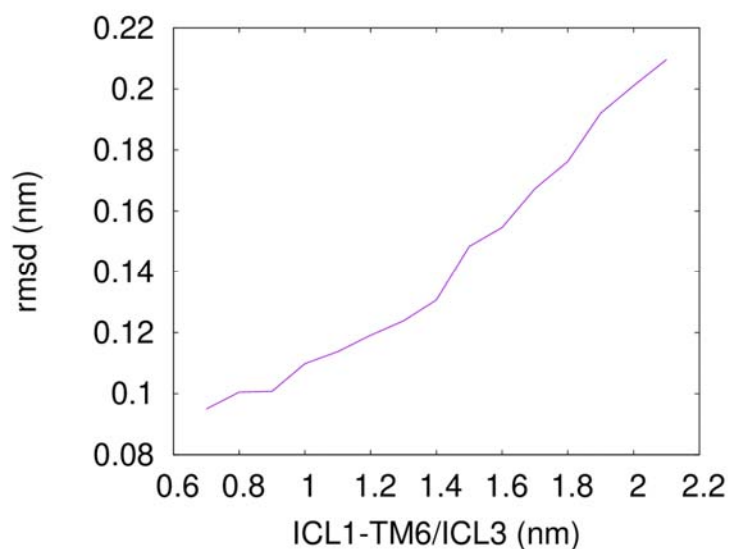

Figure S17. RMSD of the receptor backbone with respect to the inactive structures as a function of the value of the ICL1-TM6/ICL3 collective variable. The folding of the mGlu5 TM domain does not show significant changes during the umbrella sampling simulation (compare with the unbiased molecular dynamics simulation, Figure S12).

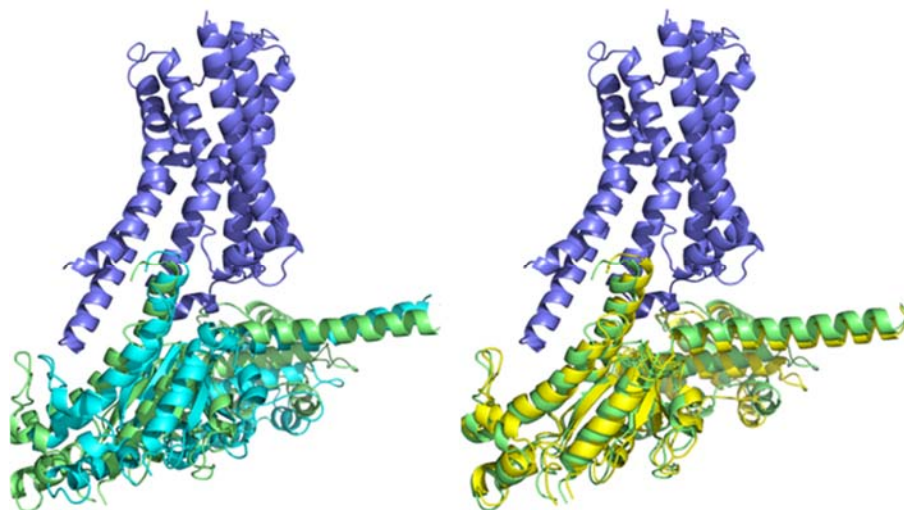

Figure S18. The conformation of the complex between Gs and the TM domain of  $\beta_2$  adrenergic receptor, obtained by protein-protein docking using Cluspro (blue-cyan complex) and Haddock2.2 (blue-yellow complex), are similar to the crystallographic  $\beta_2$  adrenergic receptor-G protein complex (PDB ID: 3SN6, blue-green complex) with a RMSD of 7.2 Å and 2.4 Å, respectively.

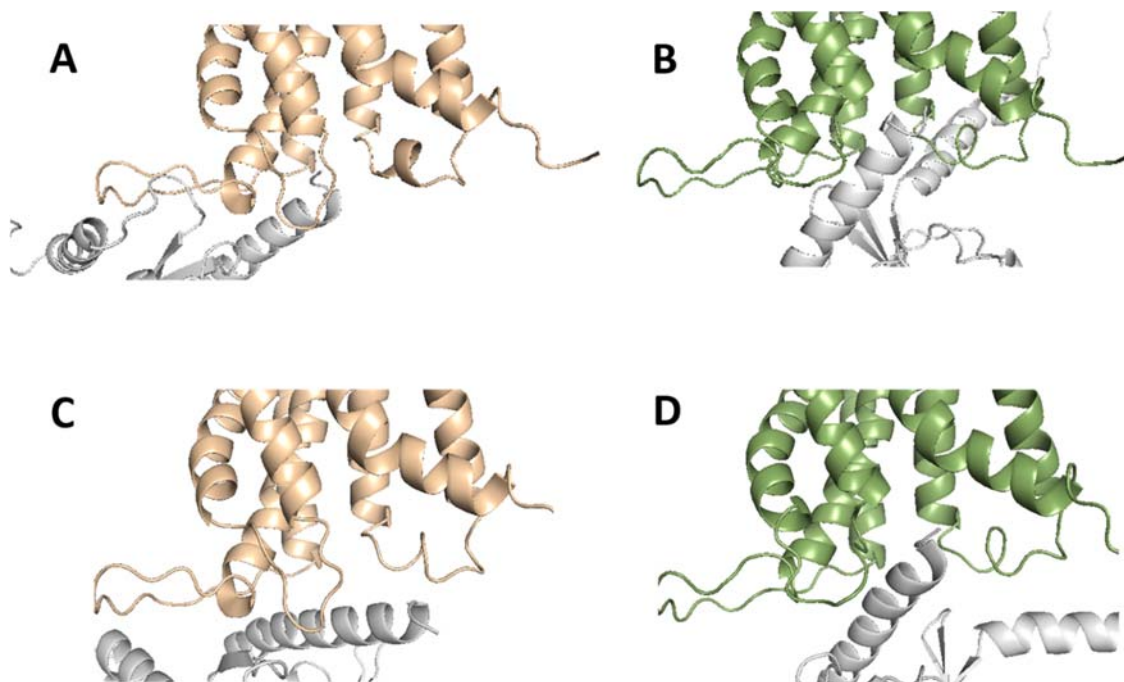

Figure S19. Comparison of the inactive mGlu5 TM-Gq pose with the "active-like" mGlu5 TM-Gq pose. In the poses corresponding to the "active-like" mGlu5 TM conformation (green) and Gq protein (gray) obtained with Cluspro (B) and Haddock2.2 (D), the Gq penetrates into the intracellular part of the receptor. In the poses corresponding to the inactive mGlu5 TM conformation (brown) and Gq protein (gray) obtained with Cluspro (Cluster 2, Table S13a) (A) and Haddock2.2 (Cluster 1 Table S13b) (C) this penetration is not seen.



Table S11a. Cluspro docking rank between the Gs protein and the  $\beta_2$  adrenergic receptors. The coordinate of Gs protein and the  $\beta_2$  adrenergic receptor were taken from the crystallographic complex with PDB ID: 3SN6.

| Cluster | Members | Representative | Weighted Score |
|---------|---------|----------------|----------------|
| 0       | 123     | Center         | -761.2         |
| 0       | 123     | Lowest Energy  | -1043.3        |
| 1       | 83      | Center         | -873           |
| 1       | 83      | Lowest Energy  | -873           |
| 2       | 57      | Center         | -704.3         |
| 2       | 57      | Lowest Energy  | -832.8         |
| 3       | 56      | Center         | -797.6         |
| 3       | 56      | Lowest Energy  | -810.1         |
| 4       | 46      | Center         | -800.6         |
| 4       | 46      | Lowest Energy  | -928.8         |
| 5       | 39      | Center         | -734.9         |
| 5       | 39      | Lowest Energy  | -910.8         |
| 6       | 36      | Center         | -716.5         |
| 6       | 36      | Lowest Energy  | -800           |
| 7       | 32      | Center         | -723.8         |
| 7       | 32      | Lowest Energy  | -876.2         |
| 8       | 31      | Center         | -732.3         |
| 8       | 31      | Lowest Energy  | -761.1         |
| 9       | 30      | Center         | -715.9         |
| 9       | 30      | Lowest Energy  | -918           |
| 10      | 30      | Center         | -779.8         |
| 10      | 30      | Lowest Energy  | -887.4         |
| 11      | 27      | Center         | -754.7         |
| 11      | 27      | Lowest Energy  | -822.2         |
| 12      | 24      | Center         | -759.6         |
| 12      | 24      | Lowest Energy  | -946.8         |
| 13      | 24      | Center         | -697.6         |
| 13      | 24      | Lowest Energy  | -771.3         |
| 14      | 23      | Center         | -689.8         |
| 14      | 23      | Lowest Energy  | -802.3         |
| 15      | 19      | Center         | -694.3         |
| 15      | 19      | Lowest Energy  | -761.7         |
| 16      | 18      | Center         | -711.1         |
| 16      | 18      | Lowest Energy  | -808.8         |
| 17      | 18      | Center         | -693           |
| 17      | 18      | Lowest Energy  | -802.5         |
| 18      | 18      | Center         | -709.4         |

|    |    |               |        |
|----|----|---------------|--------|
| 18 | 18 | Lowest Energy | -750   |
| 19 | 17 | Center        | -688.4 |
| 19 | 17 | Lowest Energy | -757.7 |
| 20 | 15 | Center        | -764.9 |
| 20 | 15 | Lowest Energy | -774.2 |
| 21 | 14 | Center        | -689.6 |
| 21 | 14 | Lowest Energy | -863.7 |
| 22 | 14 | Center        | -695.8 |
| 22 | 14 | Lowest Energy | -828.5 |
| 23 | 12 | Center        | -709.9 |
| 23 | 12 | Lowest Energy | -737.6 |
| 24 | 11 | Center        | -692.4 |
| 24 | 11 | Lowest Energy | -743.6 |
| 25 | 11 | Center        | -712.5 |
| 25 | 11 | Lowest Energy | -744.1 |
| 26 | 11 | Center        | -735.5 |
| 26 | 11 | Lowest Energy | -735.5 |
| 27 | 9  | Center        | -708.8 |
| 27 | 9  | Lowest Energy | -724.8 |
| 28 | 9  | Center        | -720.1 |
| 28 | 9  | Lowest Energy | -743.6 |
| 29 | 7  | Center        | -695.5 |
| 29 | 7  | Lowest Energy | -756.4 |

Table S11b. Haddock docking rank between the Gs protein and the  $\beta_2$  adrenergic receptors. The coordinate of Gs protein and the  $\beta_2$  adrenergic receptor were taken from the crystallographic complex with PDB ID: 3SN6.

| Cluster | Members | Haddock score |
|---------|---------|---------------|
| 12      | 4       | -111.4        |
| 5       | 12      | -99.5         |
| 1       | 31      | -97.7         |
| 4       | 12      | -81.5         |
| 2       | 25      | -78.4         |
| 11      | 6       | -77           |
| 9       | 7       | -74           |
| 3       | 16      | -66.2         |
| 8       | 7       | -64.8         |
| 6       | 10      | -63.6         |

Table SI2a. Cluspro docking rank between the “active-like” conformation of the TM domain of mGlu5 and the GTPase and helical domain of Gq protein (PDB ID: 3AH8).

| Cluster | Members | Representative | Weighted Score |
|---------|---------|----------------|----------------|
| 0       | 112     | Center         | -915.6         |
| 0       | 112     | Lowest Energy  | -1155.6        |
| 1       | 111     | Center         | -966.3         |
| 1       | 111     | Lowest Energy  | -1253.5        |
| 2       | 99      | Center         | -933           |
| 2       | 99      | Lowest Energy  | -1049.4        |
| 3       | 80      | Center         | -1058          |
| 3       | 80      | Lowest Energy  | -1225.8        |
| 4       | 64      | Center         | -889.5         |
| 4       | 64      | Lowest Energy  | -1046.7        |
| 5       | 52      | Center         | -894.4         |
| 5       | 52      | Lowest Energy  | -1278.2        |
| 6       | 50      | Center         | -1019.6        |
| 6       | 50      | Lowest Energy  | -1215.3        |
| 7       | 42      | Center         | -896.9         |
| 7       | 42      | Lowest Energy  | -1090.3        |
| 8       | 36      | Center         | -909.1         |
| 8       | 36      | Lowest Energy  | -1015.9        |
| 9       | 32      | Center         | -886.7         |
| 9       | 32      | Lowest Energy  | -1014          |
| 10      | 28      | Center         | -954.4         |
| 10      | 28      | Lowest Energy  | -954.4         |
| 11      | 27      | Center         | -916.1         |
| 11      | 27      | Lowest Energy  | -1054.8        |
| 12      | 26      | Center         | -1001.7        |
| 12      | 26      | Lowest Energy  | -1010.3        |
| 13      | 24      | Center         | -916.7         |
| 13      | 24      | Lowest Energy  | -973.6         |
| 14      | 24      | Center         | -1071.1        |
| 14      | 24      | Lowest Energy  | -1071.1        |
| 15      | 22      | Center         | -884.4         |
| 15      | 22      | Lowest Energy  | -960.3         |
| 16      | 20      | Center         | -869.7         |
| 16      | 20      | Lowest Energy  | -1177.4        |
| 17      | 20      | Center         | -897.8         |
| 17      | 20      | Lowest Energy  | -981.2         |
| 18      | 17      | Center         | -901.3         |
| 18      | 17      | Lowest Energy  | -990.3         |

|    |    |               |         |
|----|----|---------------|---------|
| 19 | 15 | Center        | -887.2  |
| 19 | 15 | Lowest Energy | -961.9  |
| 20 | 14 | Center        | -889.3  |
| 20 | 14 | Lowest Energy | -917.9  |
| 21 | 13 | Center        | -872.8  |
| 21 | 13 | Lowest Energy | -938.8  |
| 22 | 13 | Center        | -969.3  |
| 22 | 13 | Lowest Energy | -969.3  |
| 23 | 12 | Center        | -872.7  |
| 23 | 12 | Lowest Energy | -933.7  |
| 24 | 12 | Center        | -989    |
| 24 | 12 | Lowest Energy | -1008.9 |
| 25 | 10 | Center        | -927.1  |
| 25 | 10 | Lowest Energy | -939.1  |
| 26 | 10 | Center        | -907.3  |
| 26 | 10 | Lowest Energy | -950.2  |
| 27 | 8  | Center        | -902.7  |
| 27 | 8  | Lowest Energy | -930.2  |

Table SI2b. Haddock docking rank between the “active-like” conformation of the TM domain of mGlu5 and the GTPase and helical domain of Gq protein (PDB ID: 3AH8).

| Cluster | Members | Haddock score |
|---------|---------|---------------|
| 4       | 9       | -105.1        |
| 2       | 32      | -100.6        |
| 1       | 81      | -97           |
| 8       | 4       | -91.6         |
| 3       | 9       | -86.5         |
| 5       | 8       | -73.4         |
| 6       | 6       | -59.2         |
| 7       | 4       | -34.3         |

Table SI3a. Cluspro docking rank between the inactive conformation of the TM domain of mGlu5 and the GTPase and helical domain of Gq protein (PDB ID: 3AH8).

| Cluster | Members | Representative | Weighted Score |
|---------|---------|----------------|----------------|
| 0       | 103     | Center         | -708.3         |
|         |         | Lowest Energy  | -808.5         |
| 1       | 70      | Center         | -701.4         |
|         |         | Lowest Energy  | -861.8         |
| 2       | 50      | Center         | -826.5         |
|         |         | Lowest Energy  | -831.4         |
| 3       | 43      | Center         | -706.8         |
|         |         | Lowest Energy  | -847.6         |
| 4       | 42      | Center         | -659.1         |
|         |         | Lowest Energy  | -760.9         |
| 5       | 40      | Center         | -714.6         |
|         |         | Lowest Energy  | -781.0         |
| 6       | 38      | Center         | -684.0         |
|         |         | Lowest Energy  | -729.6         |
| 7       | 33      | Center         | -672.4         |
|         |         | Lowest Energy  | -768.2         |
| 8       | 33      | Center         | -681.3         |
|         |         | Lowest Energy  | -796.6         |
| 9       | 31      | Center         | -655.8         |
|         |         | Lowest Energy  | -854.2         |
| 10      | 30      | Center         | -777.8         |
|         |         | Lowest Energy  | -777.8         |
| 11      | 29      | Center         | -705.3         |
|         |         | Lowest Energy  | -789.5         |

|    |    |               |        |
|----|----|---------------|--------|
| 12 | 24 | Center        | -667.1 |
|    |    | Lowest Energy | -707.0 |
| 13 | 23 | Center        | -690.9 |
|    |    | Lowest Energy | -783.3 |
| 14 | 22 | Center        | -716.2 |
|    |    | Lowest Energy | -720.9 |
| 15 | 22 | Center        | -698.8 |
|    |    | Lowest Energy | -736.0 |
| 16 | 22 | Center        | -769.9 |
|    |    | Lowest Energy | -769.9 |
| 17 | 21 | Center        | -652.0 |
|    |    | Lowest Energy | -737.1 |
| 18 | 18 | Center        | -664.2 |
|    |    | Lowest Energy | -765.0 |
| 19 | 17 | Center        | -657.8 |
|    |    | Lowest Energy | -771.1 |
| 20 | 16 | Center        | -741.0 |
|    |    | Lowest Energy | -741.0 |
| 21 | 15 | Center        | -711.7 |
|    |    | Lowest Energy | -711.7 |
| 22 | 14 | Center        | -690.3 |
|    |    | Lowest Energy | -731.7 |
| 23 | 14 | Center        | -757.6 |
|    |    | Lowest Energy | -757.6 |
| 24 | 13 | Center        | -834.1 |
|    |    | Lowest Energy | -834.1 |
| 25 | 12 | Center        | -749.0 |
|    |    | Lowest Energy | -749.0 |
| 26 | 12 | Center        | -692.2 |
|    |    | Lowest Energy | -692.2 |
| 27 | 10 | Center        | -672.0 |
|    |    | Lowest Energy | -690.9 |
| 28 | 8  | Center        | -653.4 |
|    |    | Lowest Energy | -733.8 |
| 29 | 5  | Center        | -658.5 |
|    |    | Lowest Energy | -691.7 |

Table SI3b. Haddock docking rank between the inactive conformation of the TM domain of mGlu5 and the GTPase and helical domain of Gq protein (PDB ID: 3AH8).

| Cluster | Members | Haddock score |
|---------|---------|---------------|
| 3       | 31      | -110.6        |
| 1       | 68      | -104.3        |
| 4       | 8       | -102.7        |
| 6       | 7       | -97.5         |
| 2       | 43      | -93.4         |
| 5       | 7       | -67.3         |
| 7       | 4       | -67.3         |
| 8       | 4       | -41.8         |
